# Supplementary material for: Response of MCF-7 Breast Cancer Cells Overexpressed with P-Glycoprotein to Apoptotic Induction after Photodynamic Therapy
Source: MDPI journal article supplement (doi:10.3390/molecules26237412), 2021-12-06
Supplement: s1 [file s1]

## RELATED INFORMATION

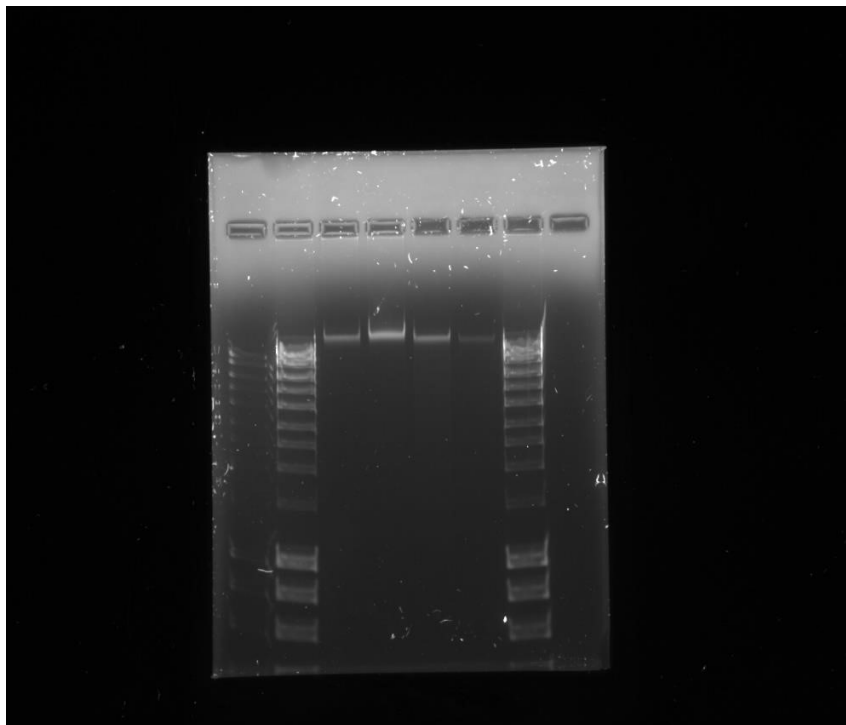

**Figure S1.** Original images of Gel Electrophoresis: The DNA extracted from ZnPcS4-mediated photodynamic therapy of the same concentration and different fluencies 5, 10, and 20 J/cm<sup>2</sup> were loaded Agarose gel electrophoresis. Lanes 1 and 6, were loaded with DNA hyper-ladder, and Lanes 2, 3, 4, and 5 with the untreated control, 5, 10, and 20 J/cm<sup>2</sup> fluencies, respectively.

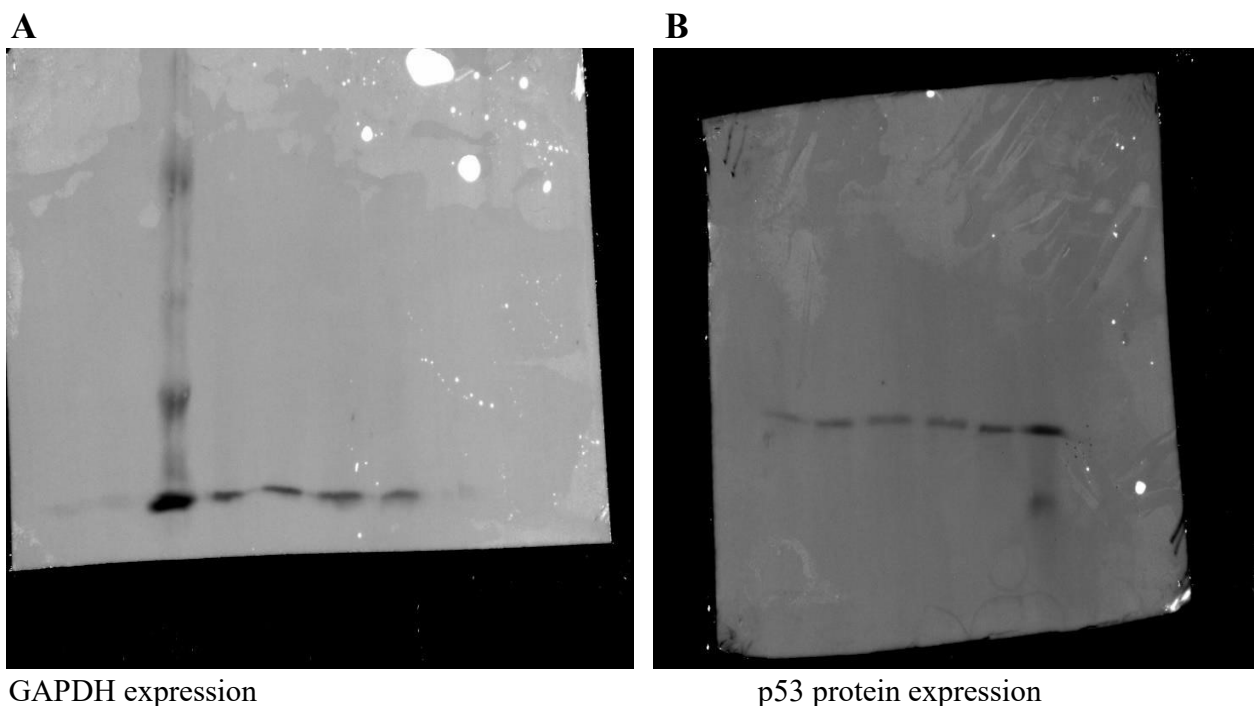

**Figure S2.** Original images of western blots for p53 and GAPDH: The GAPDH expression (**image A**) was used as the housekeeping gene and (**image B**) is the expression of p53 protein. The lanes are loaded with protein ladder, followed by untreated control, ZnPcS4-mediated PDT treated by 5, 10, and 20 J/cm<sup>2</sup> respectively. Protein expression in bands on SDS-Polyacrylamide gel was detected using ChemiDoc MP imaging system (Bio-Rad, USA).

**Table S1.** List of antibodies used in the study.

| Antibody                                              | Company                  | Cat. No.  |
|-------------------------------------------------------|--------------------------|-----------|
| Anti-p53 antibody                                     | Merck South Africa       | CBL 404   |
| Goat anti-mouse antibody                              | Abcam South Africa       | Ab97050   |
| Anti-glyceraldehyde-3-phosphate dehydrogenase (GAPDH) | Invitrogen South Africa  | MA5-15738 |
| Goat anti-mouse HRP                                   | Santa Cruz Biotechnology | SC-2005   |
